# Supplementary material
Source: Springer Nature journal article supplement (https://www.springermedizin.de/resource/supplementary/12955_2012_1046_MOESM1_ESM.pdf/9558656)

1. BP01: Get into bed

A1

B1

C1

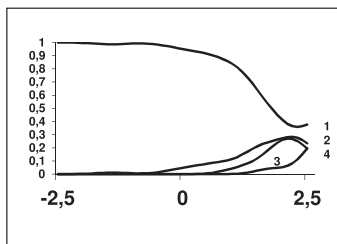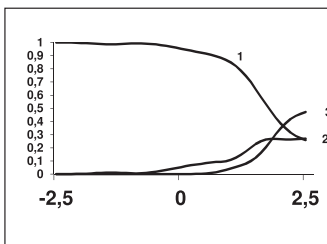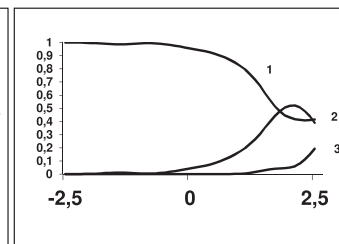

2. W05: Walk 5 minutes nonstop

A2

B2

C2

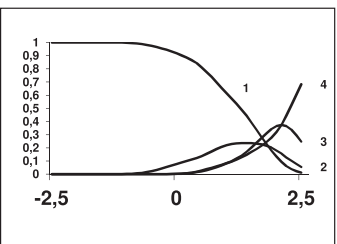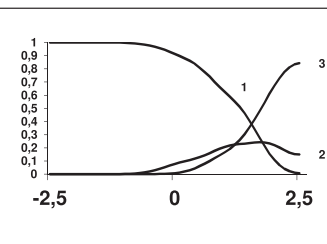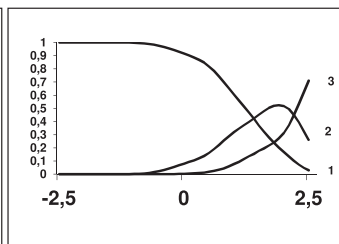

3. W07: Walk 1 kilometre with rests

A3

B3

C3

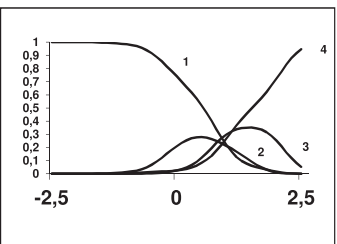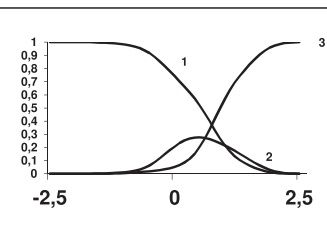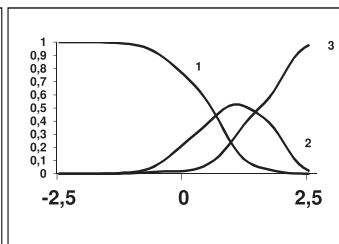

4. W12: Walk several kilometres on uneven ground

A4

B4

C4

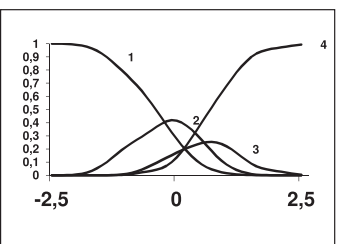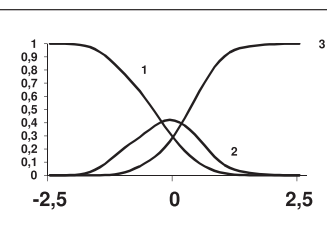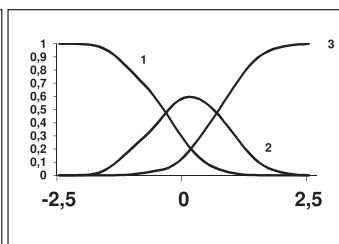

Supplement: MOESM1 [file 9558656]
